# Supplementary material for: Effects of Plant Growth-Promoting Rhizobacteria on the Physioecological Characteristics and Growth of Walnut Seedlings under Drought Stress
Source: MDPI journal article supplement (doi:10.3390/agronomy13020290), 2023-01-18
Supplement: s1 [file s1]

---

CTGGCGGCATGCTATACATGCAAGTCGAGCGAATGGATTAAGAGCTTGCTCTTATGAAGTTAGCGGCGGACGGGTGAG  
TAACACGTGGGTAACCTGCCATAAGACTGGGATAACTCCGGGAAACCGGGGCTAATACCGGATAACATTTTGAACCG  
CATGGTTCGAAATTGAAAGGCGGCTTCGGCTGTCACTTATGGATGGACCCGCGTCGCATTAGCTAGTTGGTGAGGTAA  
CGGCTCACCAAGGCAACGATGCGTAGCCGACCTGAGAGGGTGATCGGCCACACTGGGACTGAGACACGGCCCAGACTC  
CTACGGGAGGCAGCAGTAGGGAATCTTCCGCAATGGACGAAAGTCTGACGGAGCAACGCCGCGTGAGTGATGAAGGCT  
TTCGGGTCGTAAACTCTGTTGTTAGGGAAGAACAAGTGCTAGTTGAATAAGCTGGCACCTTGACGGTACCTAACCAG  
AAAGCCACGGCTAACTACGTGCCAGCAGCCGCGGTAATACGTAGGTGGCAAGCGTTATCCGGAATTATTGGGCGTAAA  
GCGCGCGCAGGTGGTTTTCTTAAGTCTGATGTGAAAGCCACGGCTCAACCGTGGAGGGTCATTGGAAACTGGGAGACT  
TGAGTGCAGAAGAGGAAAGTGAATTCCATGTGTAGCGGTGAAATGCGTAGAGATATGGAGGAACACCAGTGGCGAAG  
GCGACTTTCTGGTCTGTAAGTACACTGAGGCGCGAAAGCGTGGGGAGCAAACAGGATTAGATACCCTGGTAGTCCAC  
GCCGTAAACGATGAGTGCTAAGTGTTAGAGGGTTTCCGCCCTTTAGTGCTGAAGTTAACGCATTAAGCACTCCGCCTG  
GGGAGTACGGCCGCAAGGCTGAAACTCAAAGGAATTGACGGGGGCCCCGCACAAGCGGTGGAGCATGTGGTTTAATTTCG  
AAGCAACGCGAAGAACCTTACCAGGTCTTGACATCCTCTGACAACCCTAGAGATAGGGCTTCTCCTTCGGGAGCAGAG  
TGACAGGTGGTGCATGGTTGTCGTCAGCTCGTGTCGTGAGATGTTGGGTAAAGTCCCGCAACGAGCGCAACCCCTTGAT  
CTTAGTTGCCATCATTAAAGTTGGGCACTCTAAGGTGACTGCCGGTGACAAACCGGAGGAAGGTGGGGATGACGTCAAA  
TCATCATGCCCCCTTATGACCTGGGCTACACACGTGCTACAATGGACGGTACAAAGAGCTGCAAGACCGCGAGGTGGAG  
CTAATCTCATAAAACCGTTCTCAGTTCGGATTGTAGGCTGCAACTCGCCTACATGAAGCTGGAATCGCTAGTAATCGC  
GGATCAGCATGCCGCGGTGAATACGTTCCCGGGCCTTGTACACACCGCCCGTCACACCACGAGAGTTTGTAACACCCG  
AAGTCGGTGGGGTAACCTTTTTGGAGCCAGCCGCCTAAAGGTGGACCAGAAAATTA

## 说明书摘要

---

本发明公开了一株核桃根际促生乙酸钙不动杆菌，其分类命名为乙酸钙不动杆菌 (*Acinetobacter calcoaceticus*) X128，已于 2012 年 12 月 31 日保藏于中国微生物菌种保藏管理委员会普通微生物中心，保藏编号为：CGMCC No.7071。本发明还提供该核桃根际促生乙酸钙不动杆菌在促进核桃根系生长中的应用。本发明的核桃根际促生乙酸钙不动杆菌，以浇灌的方式均匀施入核桃根系的周围，可明显促进根系生长，提高侧根数，增加核桃底径和苗高的生长，与对照相比，差异达到极显著水平。因此，本发明为将来开发核桃专用的微生物肥料提供了优良的菌株资源。
