# Supplementary material for: Effects of Plant Growth-Promoting Rhizobacteria on the Physioecological Characteristics and Growth of Walnut Seedlings under Drought Stress
Source: MDPI journal article supplement (doi:10.3390/agronomy13020290), 2023-01-18
Supplement: s1 [file s1]

中国微生物菌种保藏管理委员会  
普通微生物中心

China General Microbiological Culture Collection Center (CGMCC)

地址: 北京市朝阳区北辰西路1号院3号, 中国科学院微生物研究所, 邮政编码: 100101  
电话: 010-64807355 传真: 010-64807288 电子邮件: cgmcc@im.ac.cn http://www.cgmcc.net

受理通知书 (收据)

存活性报告书

用于专利程序的微生物保存

发出日期 2012 年 12 月 31 日

(请求保藏人或代理人的姓名、地址)

马海林  
山东省林业科学研究院  
山东省济南市文化东路42号

本保藏中心登记入册编号

CGMCC No. 7069

你(们)提供的请求保藏并注明以下鉴定

参据的微生物(株): L90

申请专利的发明名称

上述请求保藏的微生物(株)附有

☐ 科学描述

☒ 建议的分类命名: 蜡状芽孢杆菌

申请号NO.

申请日期

年

月

日

*Bacillus*

*cereus*

该微生物(株)已于 2012 年 12 月 31 日由本保藏中心收到, 并登记入册。

根据你(们)的请求, 由该日起保存三十年, 在期满前收到提供微生物样品的请求后再延续保存五年。

该微生物(株)的存活性经本保藏中心于 2012 年 12 月 31 日检测, 结果是

(1) 存活 ☒

(2) 失活 ☐

中国微生物菌种保藏管理委员会普通微生物中心负责人签字和日期

姓名 周晓 2013 年 01 月 15 日
